# Supplementary material for: Anomalous orbital structure in a spinel–perovskite interface
Source: Springer Nature journal article supplement (doi:10.1038/npjquantmats.2016.9), 2016-08-12
Supplement: 41535_2016_BFnpjquantmats20169_MOESM341_ESM.pdf [file 41535_2016_BFnpjquantmats20169_MOESM341_ESM.pdf]

## Supplementary Information

### Anomalous orbital structure in a spinel-perovskite interface

Yanwei Cao,<sup>1,\*</sup> Xiaoran Liu,<sup>1</sup> P. Shafer,<sup>2</sup> S. Middey,<sup>1</sup> D. Meyers,<sup>1,3</sup> M. Kareev,<sup>1</sup>  
Z. Zhong,<sup>4,5</sup> J.-W. Kim,<sup>6</sup> P. J. Ryan,<sup>6</sup> E. Arenholz,<sup>2</sup> and J. Chakhalian<sup>1</sup>

<sup>1</sup>*Department of Physics, University of Arkansas, Fayetteville, AR 72701, USA*

<sup>2</sup>*Advanced Light Source, Lawrence Berkeley National Laboratory, Berkeley, California 94720, USA*

<sup>3</sup>*Department of Condensed Matter Physics and Materials Science,  
Brookhaven National Laboratory, Upton, NY 11973, USA*

<sup>4</sup>*Institut für Theoretische Physik und Astrophysik, Universität Würzburg, Am Hubland, Germany*

<sup>5</sup>*Max-Planck-Institut für Festkörperforschung, Heisenbergstrasse 1, 70569 Stuttgart, Germany*

<sup>6</sup>*Advanced Photon Source, Argonne National Laboratory, Argonne, Illinois 60439, USA.*

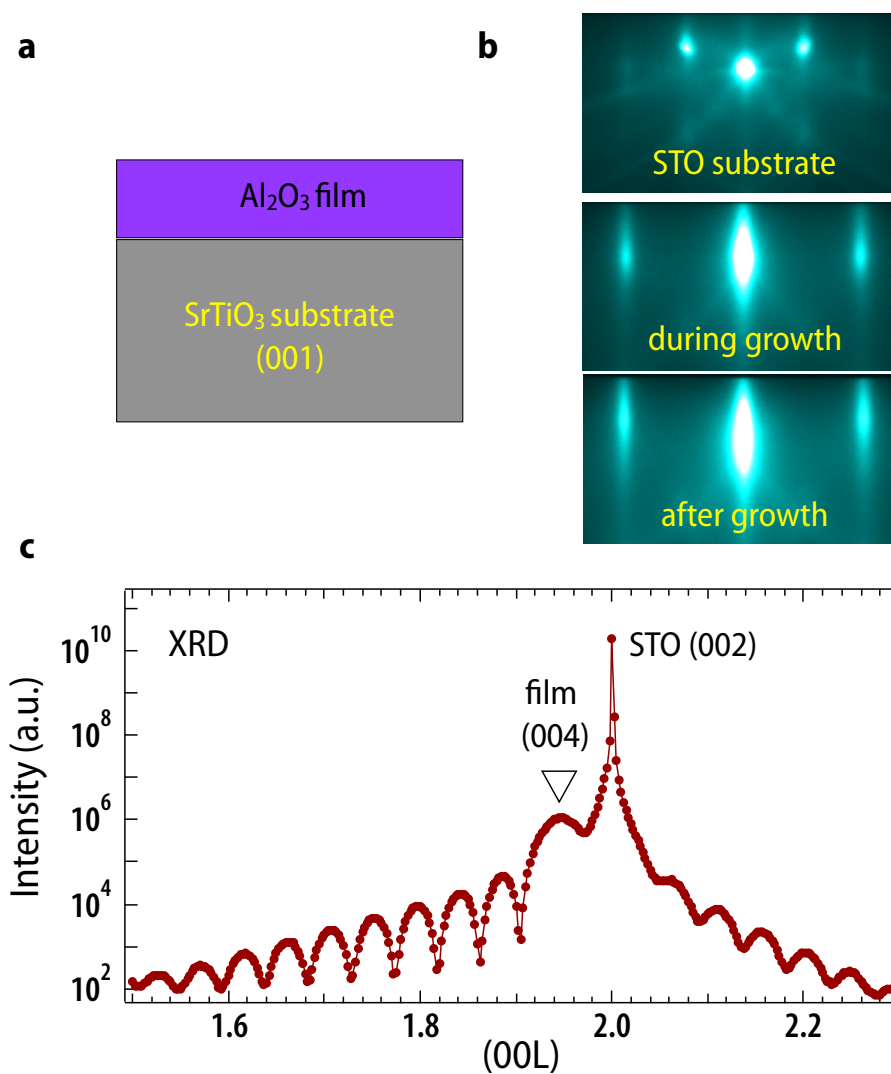

**FIG. 1 | (Supplementary Figure 1) Synthesis and characterization of AlO/STO heterostructures.** (a) Schematic view. (b) RHEED patterns of SrTiO<sub>3</sub> substrate and  $\gamma$ -Al<sub>2</sub>O<sub>3</sub> layers during growth. (c) XRD data (room temperature) of AlO/STO around (004) peak with distinct thickness fringes. The black triangle indicates the feature associated with the Al<sub>2</sub>O<sub>3</sub> film.

\* yc003@uark.edu

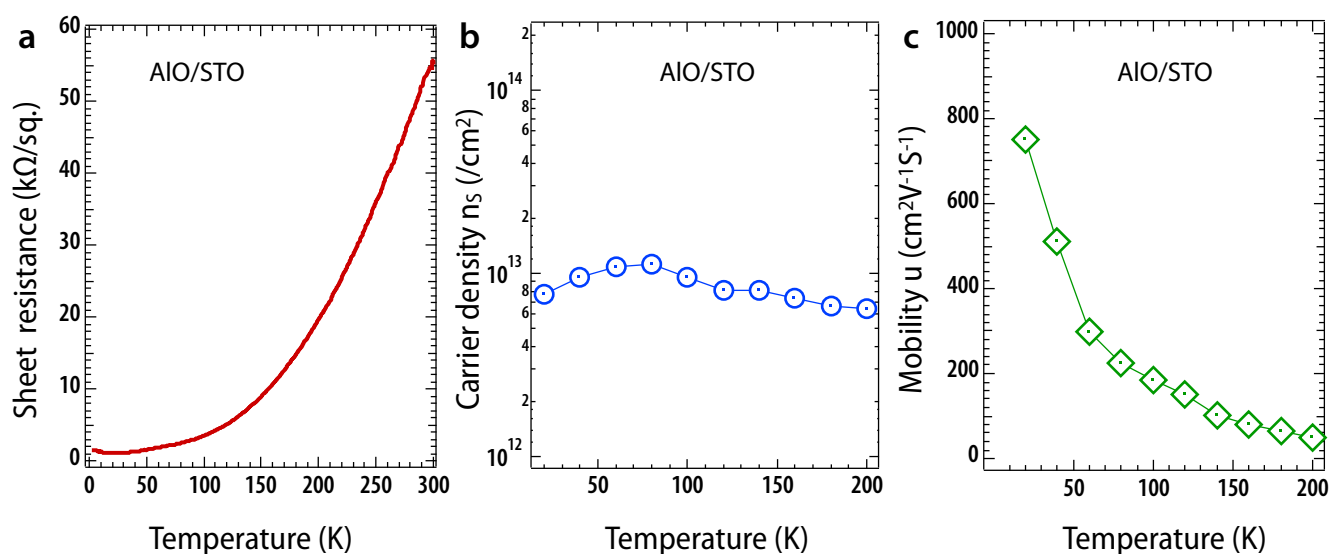

**FIG. 2 | (Supplementary Figure 2) Electrical transport of AIO/STO heterostructure. (a) Sheet resistance. (b) Carrier density. (c) Carrier mobility.**

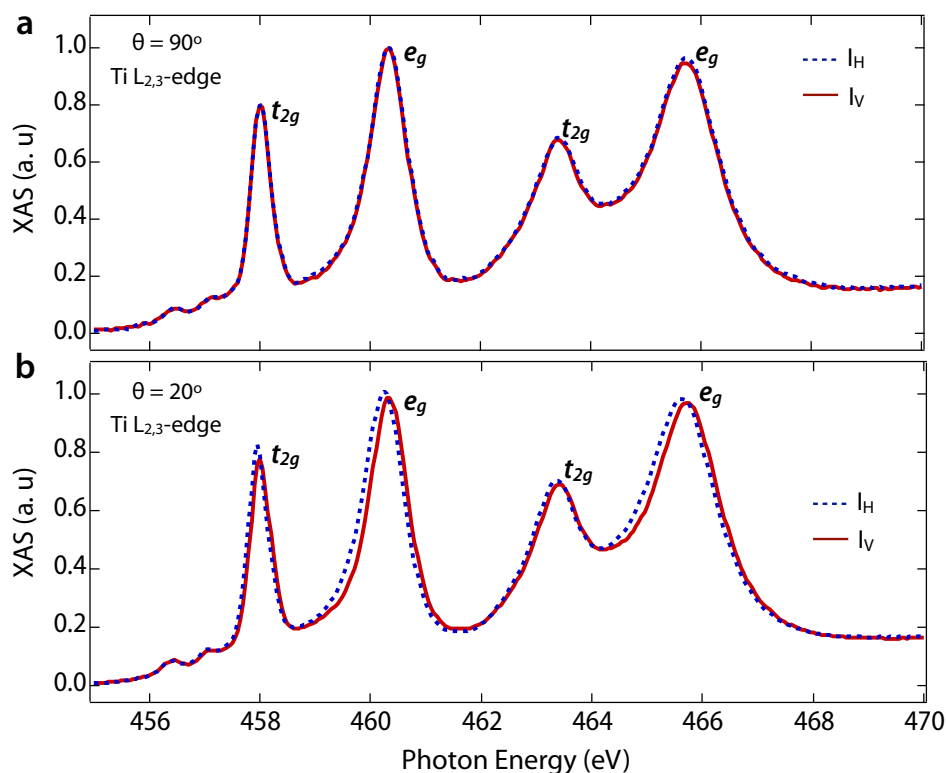

**FIG. 3 | (Supplementary Figure 3) Zoom in of linearly polarized XAS in Fig. 1(b),(c). (a) Incident angle  $\theta = 90^\circ$ . (b) Incident angle  $\theta = 20^\circ$ . In-plane [ $I_V$ ,  $E_V \parallel ab$  and  $E$  is the linear polarization vector of the photon] and out-of-plane [ $I_H$ ,  $\theta$  is the angle between  $E_H$  and  $c$ ] linearly polarized X-ray were used to measure XAS of AIO/STO at Ti  $L_{2,3}$ -edge with total electron yield (TEY, interface sensitive) detection mode at room temperature.**

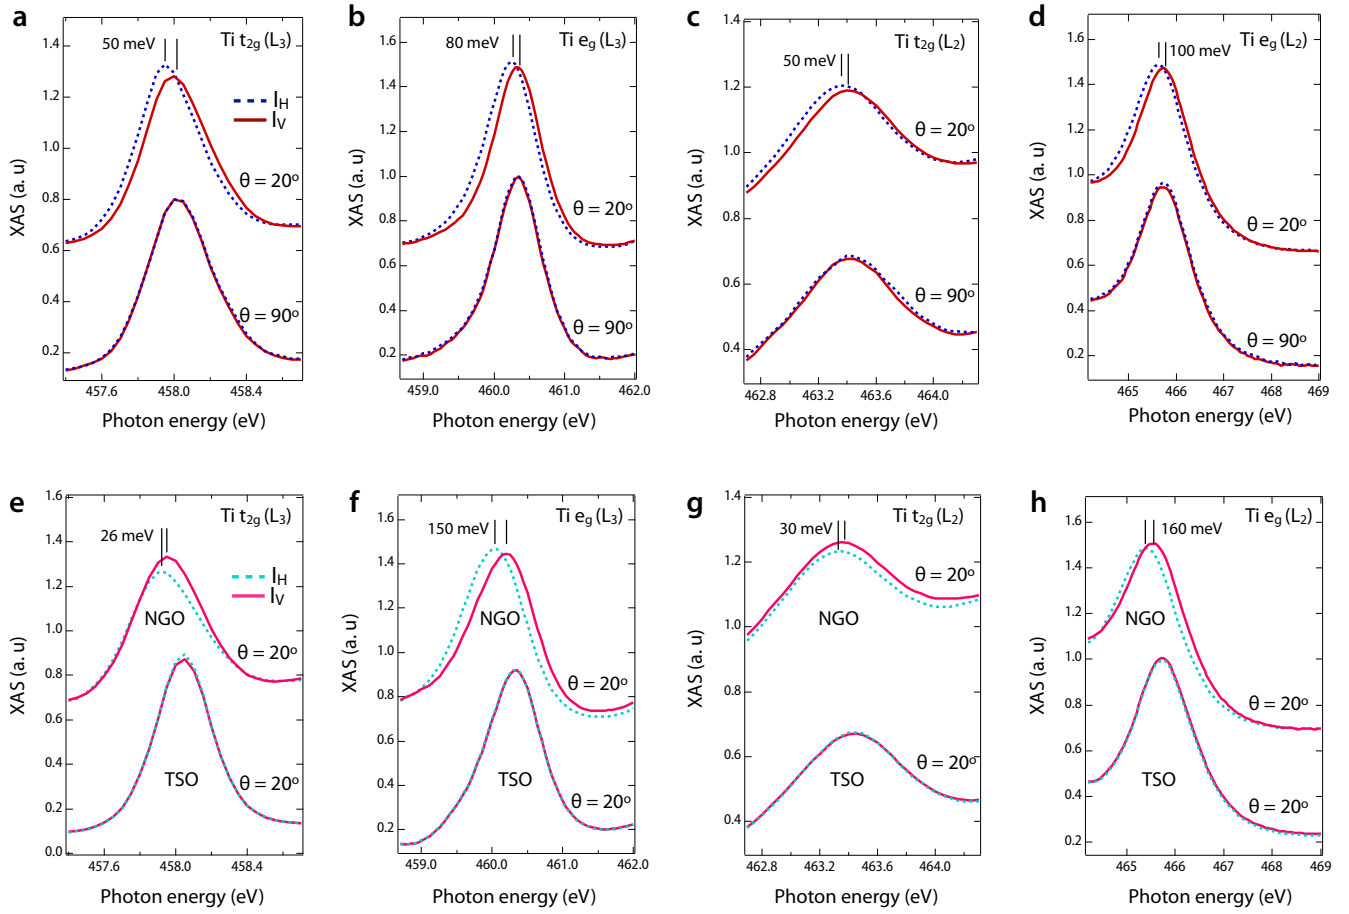

**FIG. 4 | (Supplementary Figure 4) Crystal field splitting of AIO/STO heterostructures.** (a-d) Ti  $t_{2g}$  and  $e_g$  splitting of AIO/STO for an x-ray angle of incidence  $\theta = 20^\circ$  and  $90^\circ$ , respectively. (e-h) Ti  $t_{2g}$  and  $e_g$  splitting of AIO/STO for an x-ray angle of incidence  $\theta = 20^\circ$  on tensile TbScO<sub>3</sub> and compressive NdGaO<sub>3</sub> substrates, respectively.

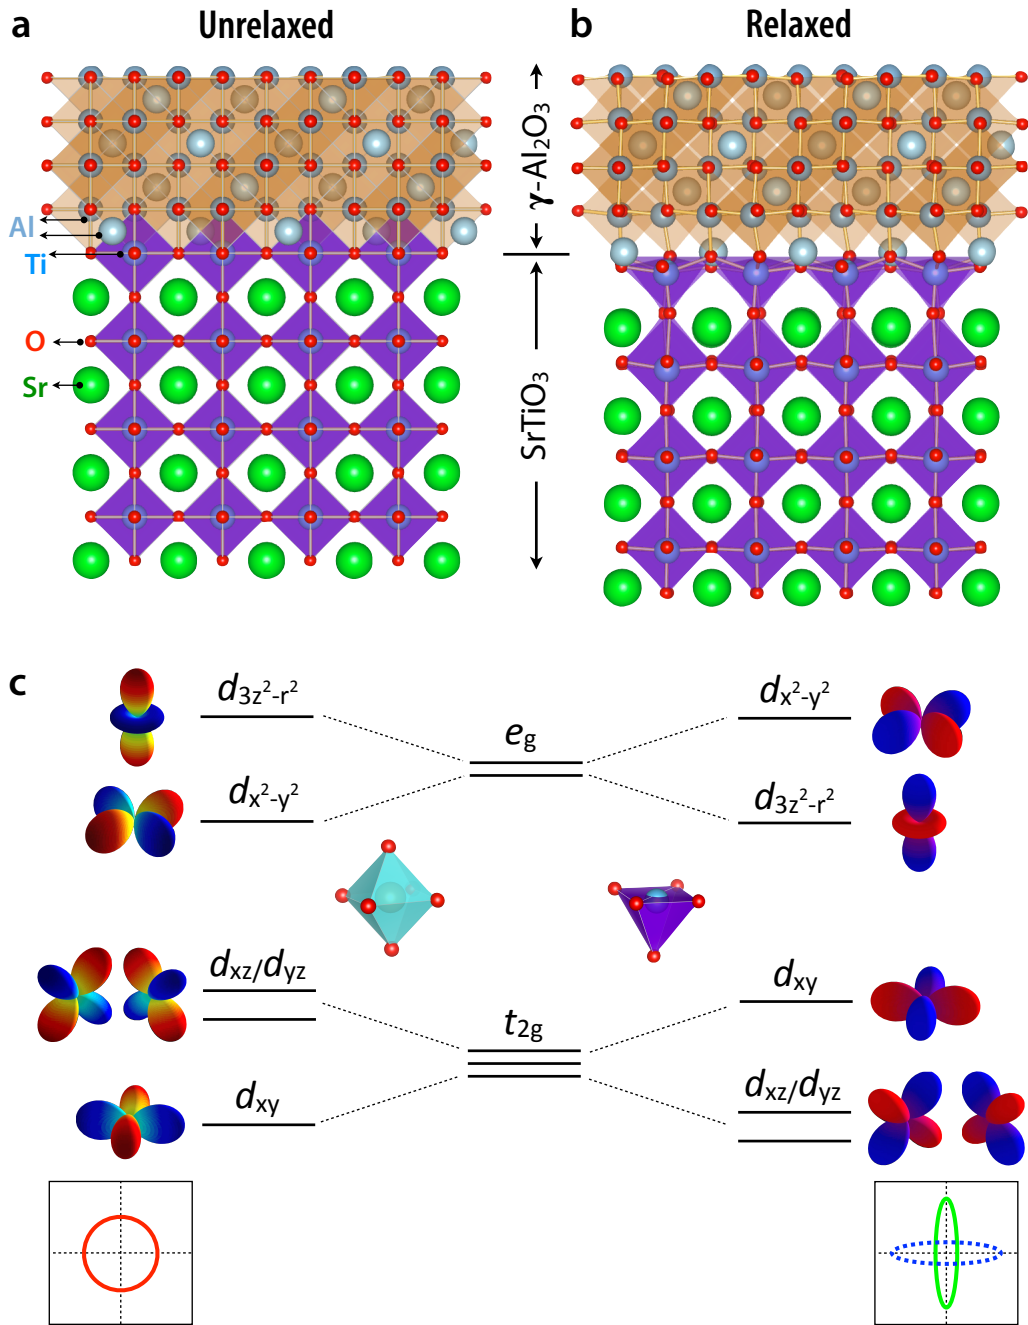

**FIG. 5 | (Supplementary Figure 5) Anisotropic and isotropic Fermi surface map depending on preferential orbital structure.** (a),(b) Schematic interfacial structures of unrelaxed and relaxed AIO/STO heterostructures, respectively. (c) Schematic of Ti 3d crystal field splitting in octahedral and pyramidal symmetries. Anisotropic Fermi surface map (blue and green curves) mainly arises from the conduction electrons with  $d_{xz}/d_{yz}$  orbitals, whereas isotropic Fermi surface map is mainly contributed by the conduction electrons with  $d_{xy}$  orbital character leading to a circle-like isotropic map of Fermi surface (red circle).
